# Supplementary material for: Laser implantation of plasmonic nanostructures into glass
Source: Royal Society of Chemistry journal article supplement (doi:10.1039/c2nr33629d), 2012-12-13
Supplement: c2nr33629d.pdf [file c2nr33629d.pdf]

## Supporting Information

Fig. S1 shows a STEM cross-sectional image of the of the pure Au implanted sample, over a wider area than the one shown in Fig 3(b). The nanoparticles (the darker dots in the image) are all within 30-40 nm of the surface. We suggest the other smaller lighter dots are denser regions of the glass sample, likely indicating that melting and rapid solidification has occurred, in line with the simulation.

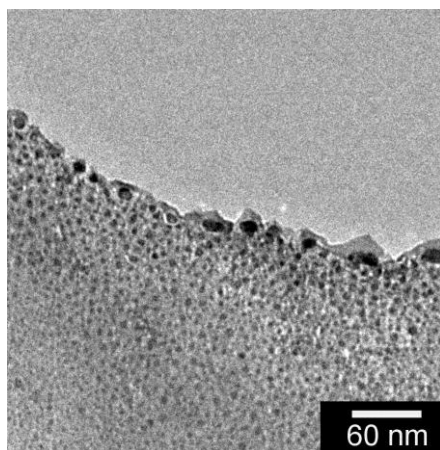

**Fig. S1** A wider area STEM cross-sectional image of the of the pure Au implanted sample shown in Fig. S1. It is clear that the metal nanoparticles are located just underneath the surface of the sample.
